# Supplementary material for: Hamster Polyomavirus Research: Past, Present, and Future
Source: MDPI journal article supplement (doi:10.3390/v13050907), 2021-05-13
Supplement: s1 [file s1]

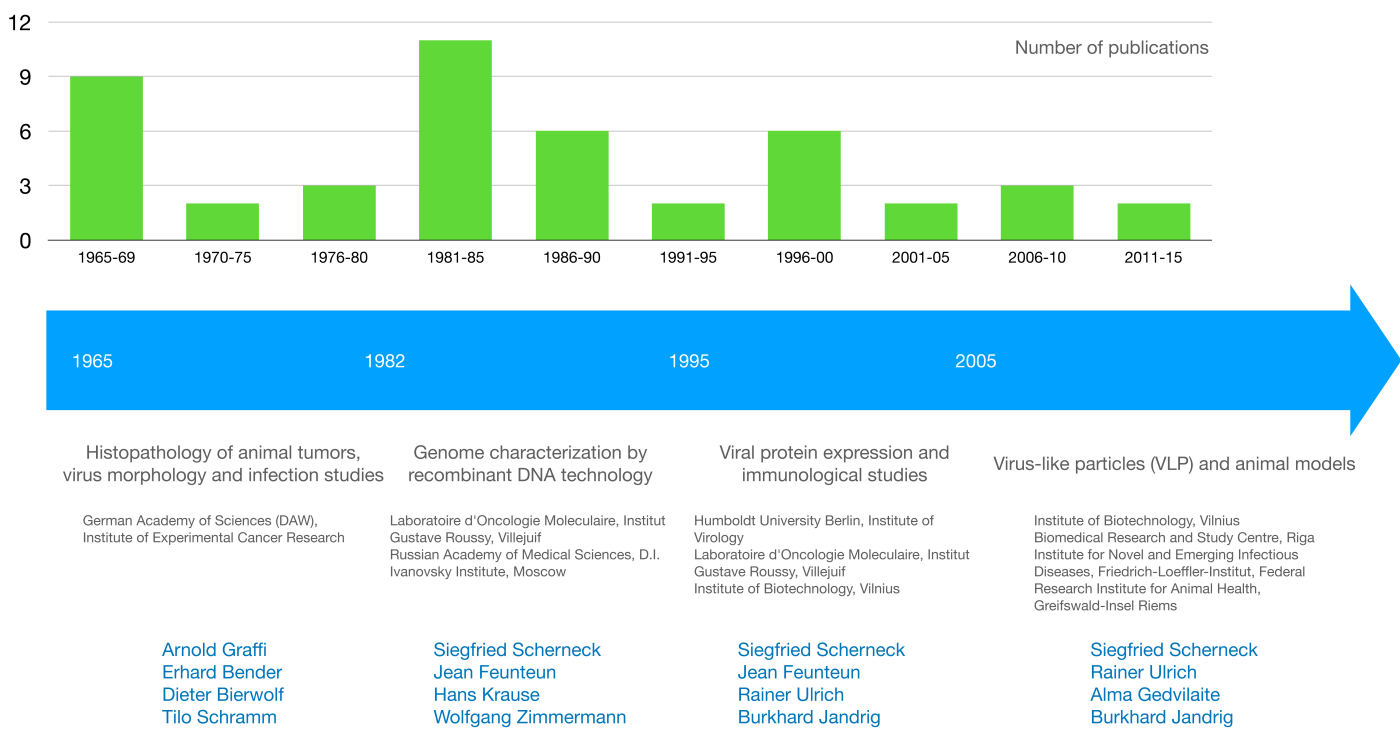

**Figure S1.** Time chart of objectives of hamster polyomavirus studies, involved main persons and number of publications when searching PubMed.

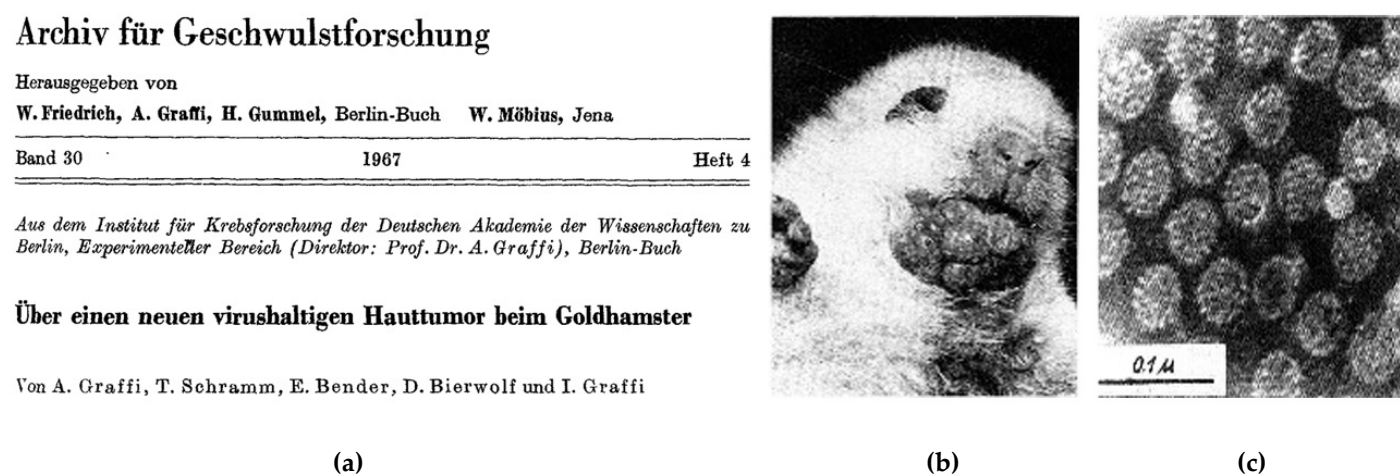

**Figure S2.** Screenshot of the title of the first paper describing a hamster polyomavirus (a), typical multiple skin tumors (b) and a picture by electron microscopy (c) (x 260,000) [13]. The Journal was discontinued in 1991.
